# Supplementary material for: In Silico evaluation and identification of fungi capable of producing endo-inulinase enzyme
Source: PLoS One. 2018 Jul 12;13(7):e0200607. doi: 10.1371/journal.pone.0200607 (PMC6042768; doi:10.1371/journal.pone.0200607)
Supplement: S3 Table — (XLSX) [file pone.0200607.s012.xlsx]

## Sheet: Sheet1
				Pro-Q Score		ProSA	PSN-QA	Verify 3D-ID
Organism	Protein Name	Sequence ID	Protein Length	LG Score	MaxSub	Z-Score	Rank	% of AA with > 0.2 Score
Aspergillus ficuum (Reference)	Endoinulinase (Reference)	3SC7	516	5.598	0.488	-8.06	17.434	96.35
Aspergillus calidoustus	Putative Ecdf	emb|CEL11660.1	506	5.564	0.464	-7.75	17.3042	99.19
Aspergillus calidoustus	Putative Glycosyl hydrolase family protein	emb|CEL10429.1	1424	4.922	0.448	-8.28	16.8492	93.28
Aspergillus fischeri NRRL 181	glycosyl hydrolase family protein	ref|XP_001266517.1	1408	5.666	0.475	-7.64	17.1471	98.36
Aspergillus fumigatus af293	Inulinase	ref|XP_748286.1	528	5.241	0.432	-7.29	17.4585	97.33
Aspergillus fumigatus Z5	Inulinase	gb|KMK58827.1	528	5.184	0.427	-7.36	17.466	97.34
Aspergillus lentulus	extracellular endo-inulinase inu2	dbj|GAQ10219.1	1419	5.424	0.442	-8.15	16.3589	98.17
Aspergillus niger	Extracellular endo-inulinase inuA	sp|O74641.1|INUA_ASPNG	516	5.646	0.489	-8.13	17.0825	96.15
Aspergillus niger	Inulinase	gb|AAK43726.1	516	5.602	0.476	-8.26	17.3653	96.55
Aspergillus niger	Endoinulinase	gb|AAL34524.1	516	5.655	0.488	-8.33	17.5238	96.55
Aspergillus niger	endoinulinase	gb|AAO18341.1	516	5.585	0.484	-8.36	17.634	96.55
Aspergillus niger	extracellular endo-inulinase inuB	sp|O74642.1|INUB_ASPNG	516	5.315	0.443	-8.05	16.7284	94.32
Aspergillus niger	endo-inulinase	gb|AAN64131.1	494	5.662	0.487	-8.34	17.493	96.55
Aspergillus niger ATCC 1015	Inulinase	gb|EHA19510.1	516	5.589	0.479	-8.29	17.4433	96.55
Aspergillus niger CBS 513.88`	Inulinase	ref|XP_001394322.1	516	5.316	0.443	-8.05	16.8977	94.52
Aspergillus rugulosus	EcdF	gb|AFT91384.1	508	5.116	0.402	-7.22	17.0713	98.35
Aspergillus udagawae	inulinase	dbj|GAO81637.1	1346	4.54	0.36	-7	17.5821	94.15
Botrytis cinerea B05.10	hypothetical protein BC1G_16010	ref|XP_001545488.1|	484	5.116	0.393	-7.14	16.9382	97.96
Botrytis cinerea BcDW1	putative inulinase protein	gb|EMR84492.1	1039	4.321	0.348	-6.53	17.0135	96.45
Fusariium oxysporum Fo5176	hypothetical protein FOXB_04900	gb|EGU84583.1	522	5.137	0.416	-7.72	17.691	98.37
Fusariium oxysporum Fo5176	hypothetical protein FOXB_01959	gb|EGU87523.1	522	5.819	0.456	-7.89	17.2784	99.18
Fusariium oxysporuminu Fo47	inulinase	gb|EWZ28461.1	522	5.435	0.432	-7.71	17.1856	99.8
Fusariium oxysporum FOSC3-a	inulinase	gb|EWY84367.1	522	5.122	0.414	-7.79	17.7382	98.37
Fusariium oxysporum HDV247	inulinase	gb|EXA30199.1	522	5.214	0.421	-7.85	17.6156	98.37
Fusariium oxysporum Vasinfectum 25433	inulinase	gb|EXM16508.1	522	5.136	0.411	-7.69	17.6562	97.35
Fusariium oxysporum raphani 54005	inulinase	gb|EXK77357.1	522	5.397	0.428	-7.72	17.1182	100
Fusariium oxysporum cubense tropical race 4 54006	inulinase	gb|EXL91590.1	522	5.096	0.408	-7.69	17.7202	98.17
Fusariium oxysporum melonis 26406	inulinase	gb|EXK27486.1	522	5.086	0.415	-7.73	17.7426	98.37
Fusariium oxysporum cubense tropical race 4	inulinase	gb|EMT72224.1	511	5.927	0.443	-8.01	18.066	97.15
Fusariium oxysporum Fo47	inulinase	gb|EWZ28230.1	522	5.785	0.446	-8.05	17.2866	98.17
Fusariium oxysporum melonis 26406	inulinase	gb|EXK24008.1	522	5.849	0.457	-7.89	17.4337	99.19
Fusariium oxysporum lycopersici 26381	inulinase	gb|EXL54341.1	522	5.776	0.435	-7.85	17.4745	97.56
Fusariium oxysporum cubense tropical race 1	inulinase	gb|ENH74256.1	474	5.434	0.414	-7.84	17.6737	98.31
Macrophomina phaseolina MS6	Glycoside hydrolase family 32	gb|EKG19847.1	475	4.247	0.34	-6.89	16.9138	95.45
Odiodendron maius Zn	Carbohydrate biinding module family 38 protein	gb|KIN00055.1	1402	5.257	0.4	-6.57	17.6952	98.97
Penicillium brasilianum	Putative Glycosyl hydrolase family protein	emb|CEJ59674.1	1419	5.061	0.385	-7.96	16.2959	96.93
Penicillium nordicum	hypothetical protein ACN38_g807	gb|KOS48216.1	506	5.599	0.431	-7.61	17.9181	98.98
Pseudogymnoascus VKMF3775	hypothetical protein V491_02070	gb|KFY24635.1	1262	5.401	0.409	-8.07	17.0787	95.25
Pseudogymnoascus VKMF-4515 (FW-2607)	hypothetical protein V491_02082	gb|KFY24613.1	1435	5.06	0.395	-7.76	16.9797	98.57
Pseudogymnoascus VKMF-3775	hypothetical protein V496_07217	gb|KFY54637.1	1059	4.897	0.379	-6.89	15.9104	97.55
Pseudogymnoascus WSF-3629	hypothetical protein VE00_10446	gb|OBT39063.1	1401	5.203	0.396	-6.96	17.6707	98.36
Pyrenochaeta DS3sAY3a	hypothetical protein IQ07DRAFT_575363	gb|OAL45715.1	522	5.359	0.405	-7.49	17.5357	96.34
Stachybotrys chartarum IBT7711	Hypothetical protein S7711_09192	gb|KEY73576.1	523	5.368	0.439	-7.84	17.3834	99.8
Stachybotrys chartarum IBT40288	hypothetical protein S40288_07884	gb|KFA81228.1	523	5.358	0.436	-7.93	17.3682	99.8
Stachybotrys chartarum IBT40293	hypothetical protein S40293_07885	gb|KFA50452.1	1437	5.586	0.444	-7.68	15.9455	98.98
Stachybotrys chartarum IBT40293	hypothetical protein S40293_09977	gb|KFA55717.1	1408	5.305	0.424	-7.61	17.0434	96.34
Stachybotrys chartarum IBT7711	hypothetical protein S7711_10080	gb|KEY75044.1	1430	5.432	0.405	-7.36	16.7797	94.72
Stachybotrys chartarum IBT40288	hypothetical protein S40288_10028	gb|KFA80736.1	1422	5.334	0.413	-7.79	16.8432	98.98
Stachybotrys chartarum IBT7711	hypothetical protein S7711_08426	gb|KEY74659.1	1446	5.604	0.428	-7.69	17.4235	96.75
Stachybotrys chartarum IBT40288	hypothetical protein S40288_08682	gb|KFA77533.1	1214	4.271	0.408	-5.7	16.9879	86.93
Stachybotrys chlorohalonata IBT40285	hypothetical protein S40285_09153	gb|KFA60067.1	1359	5.444	0.444	-7.81	16.2415	94.07
Stachybotrys chlorohalonata IBT40285	hypothetical protein S40285_09225	gb|KFA60714.1	1422	5.495	0.412	-7.66	16.4954	96.14
Talaromyces cellulolyticus	hypothetical protein TCE0_044r16118	dbj|GAM42285.1	1395	4.684	0.408	-6.81	16.6494	97
Talaromyces cellulolyticus	inulinase	dbj|GAM42287.1	515	5.5	0.448	-7.95	17.1925	95.73
Talaromyces islandicus	hypothetical protein PISL3812_01070	emb|CRG83715.1	518	5.216	0.468	-7.87	17.5764	98.98
Talaromyces purpureogenus	endo-inulinase precursor	dbj|BAA12320.1	515	5.223	0.457	-7.82	17.2243	96.95
Talaromyces stipitatus ATCC 10500	inulinase, putative	ref|XP_002485684.1	503	5.172	0.432	-6.85	17.6648	100
Talaromyces verruculosus	hypothetical protein ZTR_09149	gb|KUL83271.1	515	5.367	0.451	-7.76	17.3913	95.73
Talaromyces verruculosus	hypothetical protein ZTR_09138	gb|KUL83293.1	1405	5.098	0.407	-6.58	16.7079	95.03
Penicillium subrubescens	Extracellular endo-inulinase inu2	OKP12957.1	506	5.23	0.424	-7.73		98.78
	Extracellular endo-inulinase inuA	OKP07876.1	522	5.577	0.443	-6.65		97.77
	Extracellular endo-inulinase inuB	OKP07872.1	1638	5.204	0.411	-7.77		95.71
				Different ranges of quality:		Z-Score should be in the range of experimentally determined structure	Rank >16; good model	80% of the amino acid residues of a model should be >0.2 VERIFY 3D SCORE, to obey the structural stability and native ness
				LGscore>1.5 fairly good model			Rank < 16; bad model
				LGscore>2.5 very good model
				LGscore>4 extremly good model
				MaxSub>0.1 fairly good model
				MaxSub>0.5 very good model
				MaxSub>0.8 extremly good model
