# Supplementary material for: In Silico evaluation and identification of fungi capable of producing endo-inulinase enzyme
Source: PLoS One. 2018 Jul 12;13(7):e0200607. doi: 10.1371/journal.pone.0200607 (PMC6042768; doi:10.1371/journal.pone.0200607)
Supplement: S7 Table — (XLSX) [file pone.0200607.s016.xlsx]

## Sheet: Sheet1
Organism	Protein name	Sequence ID	Substrate	Binding Energy (K Cal)	Interacting Amino acid during last 1ns of MD Simulation	Corresponding residues identified in the endoinulinase catalytic subsites, conserved motifs or residues, involved in H-bonding with kestopentaose, described earlier [43]
Aspergillus ficuum	Endoinulinase (Reference)	3SC7	Kestopentaose	-200.322	TRP40, ASN42,GLU43,GLN133,ASN320, GLY323, SER324, ASN65,SER321, ALA64, VAL66,GLY68,TRP67,ASP298,ARG175,GLY195,GLU233	TRP40; ASN42; GLU43; ; ----; ASN320;GLY323;SER324;ASN65;SER321; ALA64; VAL66; GLY68; TRP67; ASP298; ARG175;----; GLU233
Aspergillus calidoustus_P2	Putative Glycosyl hydrolase family protein	emb|CEL10429.1	Kestopentaose	-149.37	ASN949; ASN968; TRP974; GLY975; SER1038; ARG1082, TYR1035, PRO1037; PHE973; ASN976; GLU1140; SER1230; GLU950	ASN42; ASN61; TRP67; GLY68;----;ARG175; TYR128;----;VAL66;ASN69;GLU233;SER321;GLU43
Aspergillus fumigatus P1	Inulinase	ref|XP_748286.1	Kestopentaose	-20.784	ASN55; THR113; SER334; ASP311; ASN333; GLN72; GLY244; GLU246; GLU186; GLY208; GLN148	ASN42; THR100 ;SER321 ;ASP298 ;ASN320 ; GLN59; ----; GLU233; GLU173; ----; GLN135
Botrytis cenerea_p1	Putative Inulinase	gb|EMR84492.1	Kestopentaose	-134.45	ASN565; GLN582; ASN584; TRP590; SER655; ARG698; THR847; TRP563; ASN843; GLU566; TYR651; PHE652; SER653	ASN42; GLN59; ASN61; TRP67; ----; ARG175; SER324; TRP40; ASN320; GLU43; TYR128; -----;----
Fusarium oxysporum_H_P1	Hypothetical protein FOXB_04900	gb|EGU84583.1	Kestopentaose	-190.2	ASN69; GLY76; GLN105; GLN 143; ARG183; ASN328; GLY331; SER329; ASN73; PHE74; TRP48; TRP75; MET49; ASN50; ASN77; LEU78; TYR136;ASP139;	ASN61; GLY68; GLU97; GLN135; ARG175; ASN320; GLY323; SER321; ASN65; VAL66; TRP40; TRP67; MET41; ASN42; ASN69; ILE70; TYR128;
Macrophomina phaseolina_P1	Glycosyl hydrolase family protein	gb|EKG19847.1	Kestopentaose	-167.2	GLN19; ASN21; ASN25; PHE26; GLY28; ILE30; GLN57; TYR88; ARG135; ASN280; ASP284; GLY283; GLY293; TRP27; ASN29; GLN95; SER281; TYR282; ASN225; PHE257; ASP258;PRO4	GLN59; ASN61; ASN65; VAL66; GLY68; ILE70; GLU97; TYR128; ARG175; ASN320; ----; GLY323; ----; TRP67; ASN69;GLN135; SER321;TYR322-;ASN265; ----; ASP298; PRO44
Oidiodendron maius_p1	carbohydrate-binding module family 38 protein	gb|KIN00055.1	Kestopentaose	-217.16	ASN946; GLY949; GLN978; THR981; VAL1015; GLN1016; ARG1056; ASN 1146; TRP948; PHE947; TYR1009; GLY1052; LEU1053; ASP1057; GLU1114; GLN940; ASP1179; GLY1204; THR1205	ASN65; GLY68; GLU97; THR100; ----; GLN135; ARG175; ASN265; TRP67; VAL66; TYR128; ----; ----; ASP176; GLU233; GLN59; ASP298; GLY323; SER324;
Penicillium nordicum_p1	hypothetical protein ACN38_g807	gb|KOS48216.1	Kestopentaose	-199.41	GLN49; GLY58; THR90; ARG165; ASN255; ALA314; THR245; ALA247; TRP57; GLY313; ASN32; GLU33; GLN125; GLU223; TYR118; ASN59	GLN59; GLY68; THR100; ARG175; ASN265; SER324; ----; ALA257; TRP67; GLY323; ASN42; GLU43; GLN135; GLU233; TYR128; ASN69
Stachybotrys chartarum_p1	hypothetical protein S7711_09192	gb|KEY73576.1	Kestopentaose	-196.43	ASN48; GLN103; THR 106; THR132; GLN141; THR180; ARG181; GLY202; ASN204; TRP238; GLU179; GLY201; GLU239; LEU178; TYR134; ASP137; SER138; GLU49; PHE72; ASN71; GLY70; MET47;	ASN42; GLU97; THR100; ----; GLN135; ----;ARG175; GLY196; ----;----; GLU173; ----; GLU233; ----; TYR128; ----; ----; GLU43; VAL66; ASN65; ALA64; MET41
Talaromyces cellulolyticus P1	hypothetical protein TCE0_044r16118	dbj|GAM42285.1	Kestopentaose	-176.53	ASN940; GLN957; GLY966; GLN995; THR998; TYR1026; GLN1033; ARG1073; ALA1155; ASN1163; VAL964; TRP965; GLU941;PRO1028; GLU1071; ASP1074; GLU1131; THR1153; PRO1154	ASN42; GLN59; GLY68; GLU97; THR100; TYR128; GLN135; ARG175; ALA257; ASN265; VAL964; TRP67; GLU43; ----; GLU173; ASP176; GLU233;
						"---" indicates the corresponding aminoacid is not identified in the earlier report
